# Supplementary material for: Performance of field-effect transistors based on NbxW1−xS2monolayers
Source: Royal Society of Chemistry journal article supplement (doi:10.1039/c6nr00380j), 2016-01-01
Supplement: c6nr00380j1.pdf [file c6nr00380j1.pdf]

## Performance of Field-effect Transistors based on $\text{Nb}_x\text{W}_{1-x}\text{S}_2$ monolayer

Li-ping Feng<sup>\*1</sup>, Wan-zhen Jiang<sup>1</sup>, Jie Su<sup>1</sup>, Lian-qun Zhou<sup>2</sup>, Zheng-tang Liu<sup>1</sup>

<sup>1</sup>State Key Lab of Solidification Processing, College of Materials Science and Engineering, Northwestern Polytechnical University, Xi'an, Shaanxi, 710072, P. R. China

<sup>2</sup>Medical Micro and Nano-technology Department, CAS Key Laboratory of Bio-Medical Diagnostics, Suzhou Institute of Biomedical Engineering and Technology, Chinese Academy of Sciences, Suzhou, Jiangsu, 215163, P. R. China

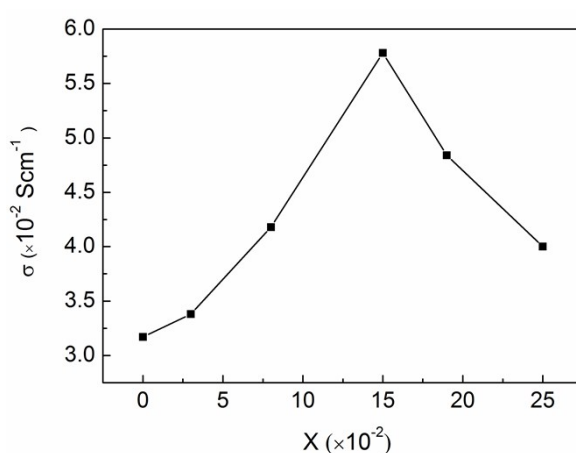

Figure S1. The electrical conductivities of  $\text{Nb}_x\text{W}_{1-x}\text{S}_2$  film as a function of  $x$ .

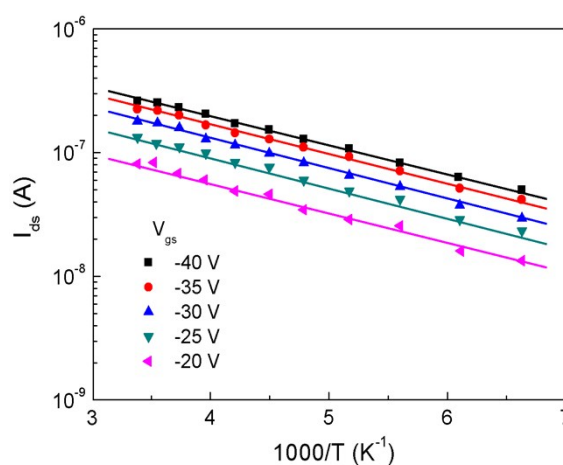

Figure S2. Arrhenius plot for barrier height extraction corresponding to Pd- $\text{Nb}_{0.15}\text{W}_{0.85}\text{S}_2$  contact
